# Supplementary material for: Early-stage multi-cancer detection using an extracellular vesicle protein-based blood test
Source: PubMed Central journal article supplement (PMC9053211; doi:10.1038/s43856-022-00088-6), 2022-03-17
Supplement: 43856_2022_88_MOESM1_ESM.pdf [file 43856_2022_88_MOESM1_ESM.pdf]

## Description of Additional Supplementary Files

**File Name:** Supplementary Data 1

**Description:** Overview of the subjects included in the cohort with summarized information on sample type, staging, histology, sex, age, and BMI.

**File Name:** Supplementary Data 2

**Description:** Detailed information in a per subject basis for sample type, cohort, sex, age, stage, TNM status, histology, and protein biomarker readings.

**File Name:** Supplementary Data 3

**Description:** Information in a per subject basis of the nanoparticle tracking analysis results

**File Name:** Supplementary Data 4

**Description:** Information of the biomarker's abbreviations, full names, limit of detection values and units of measure.

**File Name:** Supplementary Data 5

**Description:** Average subject fit from the logistic classifier model and the number of times the subject was featured on the held-out test sets.

**File Name:** Supplementary Data 6

**Description:** AUC and threshold values in the held-out test sets for the logistic classifier model built from the training set splits.

**File Name:** Supplementary Data 7

**Description:** Logistic regression model coefficients and importance scores for each of the biomarkers used in the logistic classifier.

**File Name:** Supplementary Data 8

**Description:** Subject information, plasma protein quantification, nanoparticle tracking analysis and, key biomarker levels for the cohort used in comparison with differential ultracentrifugation.

**File Name:** Supplementary Data 9

**Description:** Pearson correlation coefficients for the biomarkers used in the logistic classifier
